# Supplementary material
Source: HighWire-hosted journal article supplement (https://bjsm.bmj.com/content/54/13/771)
Supplement: inline-supplementary-material-1 [file inline-supplementary-material-1.pdf]

**Supplementary Table 1:** American College of Sports Medicine's (ACSM) guidelines for aerobic exercise testing and prescription.[22]

| <b>Domain</b>    | <b>Moderate Intensity</b>                                                                                                                                                                                                                    | <b>Vigorous Intensity</b>                                                                                  |
|------------------|----------------------------------------------------------------------------------------------------------------------------------------------------------------------------------------------------------------------------------------------|------------------------------------------------------------------------------------------------------------|
| <b>Frequency</b> | 5x/wk to total 150-300 mins/wk                                                                                                                                                                                                               | 3x/wk to total 75-150 mins/wk                                                                              |
| <b>Intensity</b> | - HR <sub>max</sub> : 64-76%<br>- HRR: 40-60%<br>- VO <sub>2max</sub> : 46-63%<br>- RPE: 5-6<br>- METs: 3-5.9                                                                                                                                | - HR <sub>max</sub> : 77-95%<br>- HRR: 60-85%<br>- VO <sub>2max</sub> : 63-90%<br>- RPE: 7-8<br>- METs: ≥6 |
| <b>Time</b>      | 30-60 mins/day in bouts of at least 10 mins each                                                                                                                                                                                             | 20-30 mins/day of continuous activity                                                                      |
| <b>Type</b>      | Any modality that does not impose excessive orthopedic stress; walking is the most common type of activity. Aquatic exercise and stationary cycle exercise may be advantageous for those with limited tolerance for weight bearing activity. |                                                                                                            |

HR<sub>max</sub>; maximum heart rate, HRR; heart rate reserve, VO<sub>2max</sub>; maximal aerobic capacity, RPE; rate of perceived exertion (on a scale of 1-10), METs; metabolic equivalents.
