# Supplementary material
Source: HighWire-hosted journal article supplement (https://bjsm.bmj.com/content/54/13/771)
Supplement: inline-supplementary-material-4 [file inline-supplementary-material-4.pdf]

**Supplementary Table 3:** Details of aerobic intervention.

| Study               | Outcome(s) (mode)                                            | Frequency (sessions/wk) | Intensity                         | Bouts of 10 mins? | Time (mins/session) | Duration (# wks) | Supervised (# wks) | ACSM criteria met? | Intervention adherence (%) | Risk of Bias |
|---------------------|--------------------------------------------------------------|-------------------------|-----------------------------------|-------------------|---------------------|------------------|--------------------|--------------------|----------------------------|--------------|
| Ağlamiş, 2008       | 6MWT                                                         | 3                       | 50% HRR                           | yes               | 45                  | 12               | yes (12)           | no                 | 74                         | high         |
| Alkatan, 2016       | 6MWT                                                         | 3                       | 40-50% HRR                        | yes               | 20-30               | 12               | yes (12)           | no                 | 97                         | high         |
| Alkatan, 2016b      | HR, BP (rest), IL-6, TNF- $\alpha$ (blood – multiplex array) | 3                       | 40-50% HRR                        | yes               | 20-30               | 12               | yes (12)           | no                 | 98                         | high         |
| Bautch, 1997        | N/A                                                          | 3                       | 12 RPE                            | yes               | 60 (aerobic NR)     | 12               | yes (12)           | no                 | 88                         | high         |
| Beckwée, 2015       | N/A                                                          | 3                       | 14-17 RPE                         | yes               | 40                  | 18               | yes (6)            | no                 | 89                         | low          |
| Benli Küçük, 2018   | N/A                                                          | 3                       | NR                                | yes               | 20                  | 4                | yes (4)            | no                 | NR                         | high         |
| Bressel, 2014       | N/A                                                          | 3                       | 50-70% HRR                        | yes               | <30                 | 6                | yes (6)            | no                 | 100                        | high         |
| Brooks, 2014        | N/A                                                          | 5                       | NR                                | NR                | NR                  | 8                | no                 | no                 | 80                         | high         |
| Brosseau, 2012      | 6MWT                                                         | 3                       | 15-19 RPE                         | yes               | 65                  | 52               | yes (52)           | progressively yes  | 57                         | high         |
| Casilda-López, 2017 | HR (max), 6MWT                                               | 3                       | NR                                | yes               | 45                  | 8                | yes (8)            | no                 | 100                        | low          |
| Cheung, 2014        | N/A                                                          | 4                       | NR                                | yes               | 15-30               | 8                | no                 | no                 | 82                         | high         |
| de Rooij, 2017      | 6MWT                                                         | 2                       | 50-80% HR/VO <sub>2max</sub> /HRR | yes               | 20+                 | 20               | yes (20)           | no                 | 85                         | some         |
| Ettinger, 1997      | VO <sub>2</sub> (peak – graded treadmill), 6MWT              | 3                       | 50-70% HRR                        | yes               | 60                  | 72               | yes (12)           | yes                | 68                         | high         |
| Evcik, 2002         | N/A                                                          | 3                       | NR                                | yes               | 10                  | 12               | no                 | no                 | 93                         | high         |
| Fitzgerald, 2011    | N/A                                                          | 3                       | NR                                | no                | NR                  | 24               | yes (12 sessions)  | no                 | 75                         | high         |
| Fransen, 2001       | N/A                                                          | 2                       | 50-60% HR <sub>max</sub>          | yes               | 20                  | 8                | yes (group only)   | no                 | NR                         | high         |

|                          |                                                              |   |                             |     |     |    |          |                      |    |      |
|--------------------------|--------------------------------------------------------------|---|-----------------------------|-----|-----|----|----------|----------------------|----|------|
| Gaudreault, 2011         | N/A                                                          | 2 | NR                          | no  | 15  | 12 | NR       | no                   | NR | high |
| Gomes, 2012              | IL-6, TNF- $\alpha$<br>(plasma –<br>ELISA)                   | 3 | 70-75%<br>HR <sub>max</sub> | yes | 40  | 12 | yes (12) | no                   | NR | high |
| Gomes, 2014              | N/A                                                          | 3 | 70% HR <sub>max</sub>       | yes | 40  | 12 | yes (12) | no                   | NR | high |
| Gomes, 2016              | VO <sub>2</sub><br>(estimated<br>max – graded<br>treadmill)  | 3 | 70% HR <sub>max</sub>       | yes | 30  | 12 | yes (12) | no                   | 94 | high |
| Hunt, 2013               | 6MWT                                                         | 2 | NR                          | NR  | NR  | 10 | no       | no                   | 85 | low  |
| Kabiri, 2018             | 6MWT                                                         | 3 | RPE 11-13                   | yes | 30  | 4  | yes (4)  | no                   | 90 | high |
| Kappetijin, 2014         | 6MWT                                                         | 2 | NR                          | no  | 11  | 8  | yes (8)  | no                   | 97 | high |
| Keefe, 2004              | VO <sub>2</sub> (peak –<br>graded bike<br>test)              | 3 | 50-70%<br>HR <sub>max</sub> | yes | 30  | 12 | yes (12) | no                   | NR | some |
| Koli, 2015               | VO <sub>2</sub><br>(estimated<br>max – 2km<br>walk test)     | 3 | NR                          | yes | 55  | 52 | yes (52) | no                   | 95 | some |
| Kovar, 1992              | 6MWT                                                         | 3 | NR                          | NR  | 30  | 8  | yes (8)  | no                   | 90 | high |
| Kuprnrirataikul,<br>2018 | 6MWT                                                         | 3 | NR                          | yes | 30  | 4  | yes (4)  | no                   | 83 | some |
| Larose, 2013             | VO <sub>2</sub> (peak –<br>graded<br>treadmill), HR<br>(max) | 3 | 50% HR <sub>max</sub>       | yes | 45  | 8  | yes (NR) | progressively<br>yes | 80 | high |
| Lau, 2014                | 6MWT                                                         | 2 | NR                          | no  | 38  | 10 | yes (10) | no                   | 90 | high |
| Lim, 2010                | N/A                                                          | 3 | 65% HR <sub>max</sub>       | no  | NR  | 8  | yes (8)  | no                   | 88 | high |
| Lund, 2008               | N/A                                                          | 2 | NR                          | no  | yes | 8  | yes (8)  | no                   | 90 | high |
| Mangione, 1999           | VO <sub>2</sub> (peak –<br>graded                            | 3 | High - 70%<br>HRR, Low -    | yes | 25  | 10 | yes (10) | no                   | 92 | high |

|                       | treadmill)<br>6MWT                                 |                              | 40% HRR                     |     |     |    |            |     |     |      |  |
|-----------------------|----------------------------------------------------|------------------------------|-----------------------------|-----|-----|----|------------|-----|-----|------|--|
| Messier, 2000         | 6MWT                                               | 3                            | 50-75% HRR                  | yes | 30  | 24 | yes (24)   | no  | 88  | high |  |
| Messier, 2004         | 6MWT                                               | 3                            | 50-75% HRR                  | yes | 45  | 78 | yes (16)   | no  | 80  | low  |  |
| Messier, 2007         | 6MWT                                               | 3                            | 50-75% HRR                  | yes | 40  | 24 | yes (2/wk) | no  | 81  | low  |  |
| Messier, 2014         | IL-6 (plasma –<br>ELISA),<br>6MWT                  | 3                            | NR                          | yes | 40  | 78 | yes (24)   | no  | 88  | low  |  |
| Nicklas, 2004         | IL-6, TNF- $\alpha$<br>(serum –<br>ELISA)          | 3                            | 50-75% HRR                  | yes | 45  | 78 | yes (16)   | no  | 80  | low  |  |
| Peeler, 2015          | N/A                                                | 3                            | NR                          | yes | 25  | 12 | yes (12)   | no  | 100 | high |  |
| Péloquin, 1999        | 6MWT                                               | 3                            | 40-50% HRR                  | no  | 17  | 12 | yes (12)   | no  | 90  | high |  |
| Rosa, 2011            | N/A                                                | 3                            | NR                          | yes | 40  | 8  | yes (8)    | no  | NR  | high |  |
| Rosemffet, 2004       | 6MWT                                               | 2                            | NR                          | yes | 30  | 8  | yes (8)    | no  | 70  | high |  |
| Salacinski, 2012      | N/A                                                | every 2 <sup>nd</sup><br>day | 70-75%<br>HR <sub>max</sub> | yes | 40  | 12 | yes (2)    | no  | 68  | high |  |
| Samut, 2015           | IL-6, TNF- $\alpha$<br>(serum –<br>ELISA),<br>6MWT | 3                            | 65-70%<br>HR <sub>max</sub> | NR  | NR  | 6  | NR         | no  | 100 | high |  |
| Singh, 2011           | HR, BP (NR)                                        | 2                            | 60% HR <sub>max</sub>       | yes | 30  | 8  | NR         | no  | NR  | high |  |
| Somers, 2012          | N/A                                                | 3                            | 55-70% HRR                  | yes | 65  | 12 | yes (12)   | yes | 70  | high |  |
| Thorstensson,<br>2005 | N/A                                                | 2                            | 60% HR <sub>max</sub>       | yes | 15  | 2  | yes (6)    | no  | 94  | high |  |
| Wallis, 2016          | BP (rest)                                          | 5                            | 3 RPE                       | yes | 10+ | 12 | no         | no  | 70  | low  |  |
| Wang, 2011            | 6MWT                                               | 3                            | 3-4 RPE                     | yes | 20  | 12 | yes (12)   | no  | 93  | low  |  |
| Yennan, 2010          | N/A                                                | NR                           | NR                          | NR  | NR  | 6  | yes (6)    | no  | NR  | high |  |
| Average               |                                                    |                              |                             |     |     |    |            |     | 86  |      |  |

Only the aerobic portion of studies with mixed interventions are reported. 6MWT; 6-minute walk test, HR; heart rate, BP; blood pressure; IL-6; interleukin 6, TNF- $\alpha$ ; tumor necrosis factor alpha, ELISA; enzyme-linked immunosorbent assay, N/A; not applicable, NR; not reported, HRR; heart rate reserve, RPE; rate of perceived exertion, HR<sub>max</sub>; maximum heart rate.
